# Supplementary material for: Tissue culture optimization and genome editing for yield improvement of an Indian rice landrace Chittimuthyalu
Source: Research Square preprint supplement (doi:10.21203/rs.3.rs-6923706/v1), 2025-07-22
Supplement: Supplementary file 1 [file c907cf89ba8ebaa0f9fdbf03.docx]

**
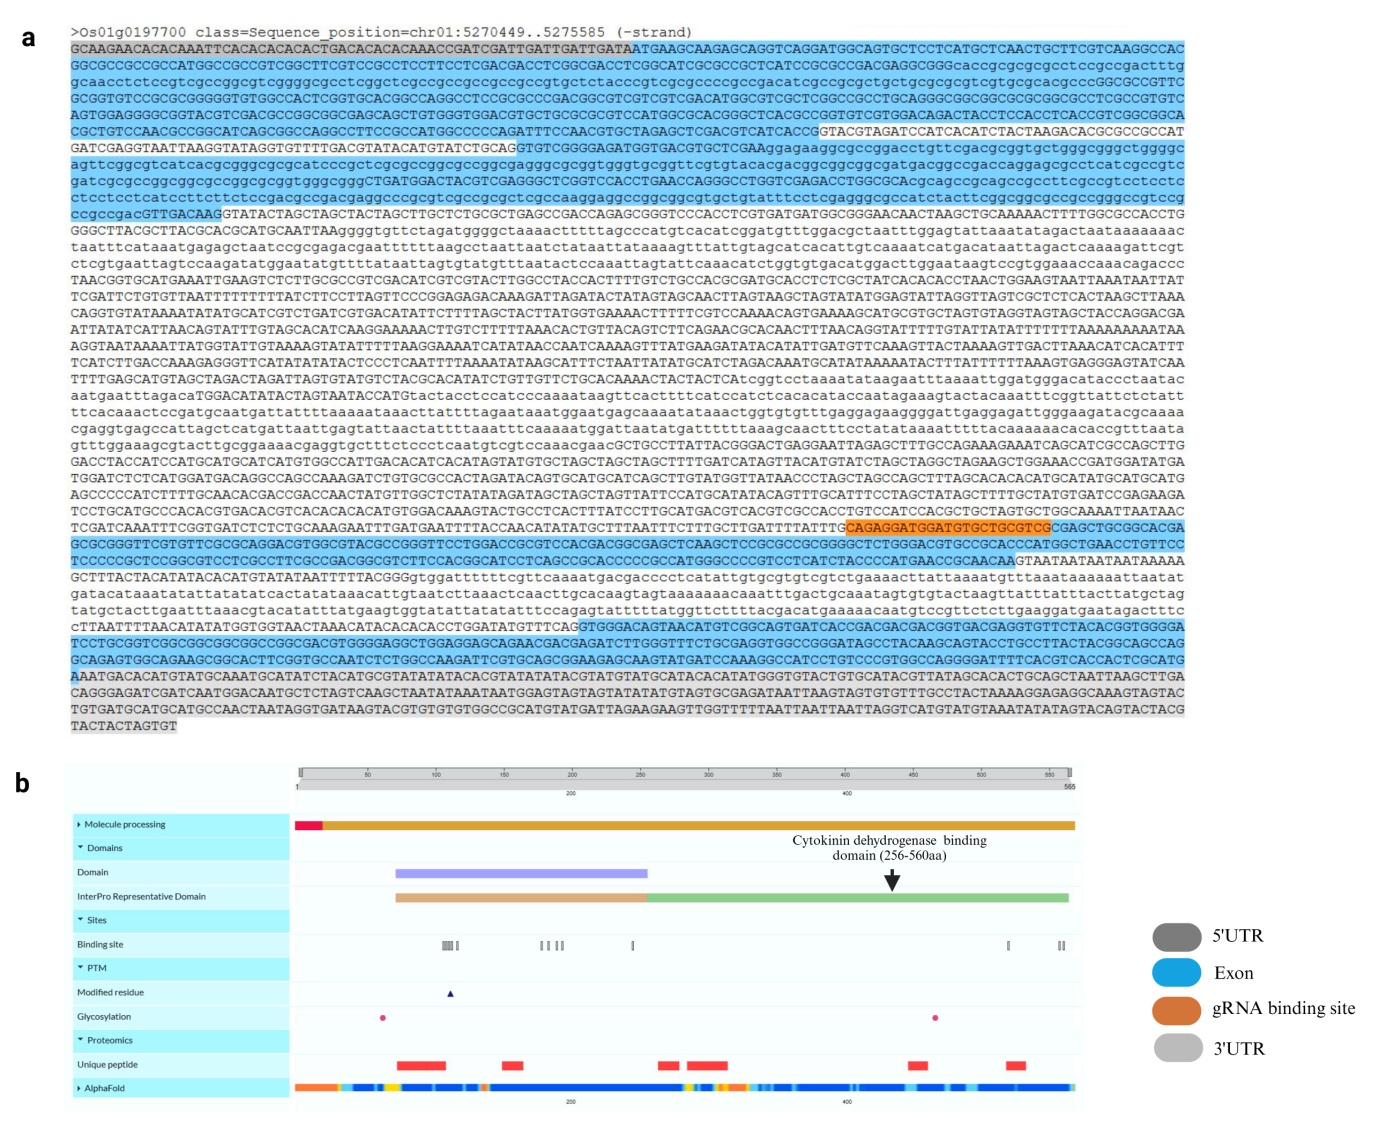
**

**Supplementary Fig. 1(a).** *OsCKX2*, (a) gene sequence retrieved from the RAP-DB portal (<https://rapdb.dna.affrc.go.jp/>), (b) protein domain identified from the UniProt blast server (https://www.uniprot.org/uniprotkb)


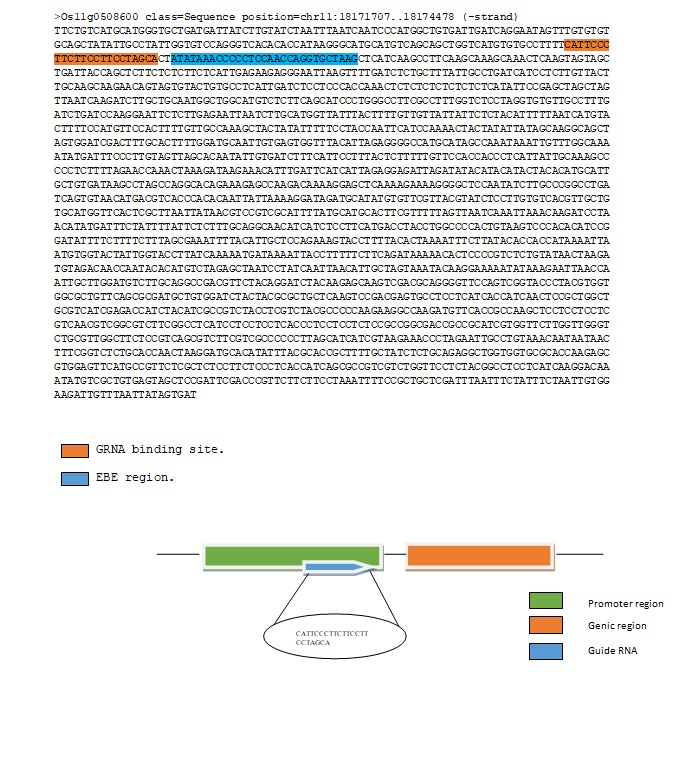


**Supplementary Fig. 1(b).** *OsSweet14* promoter sequence retrieved from the RAP-DB portal (<https://rapdb.dna.affrc.go.jp/>) and depiction of guide RNA binding site in the promoter region of *OsSWEET14.*

**
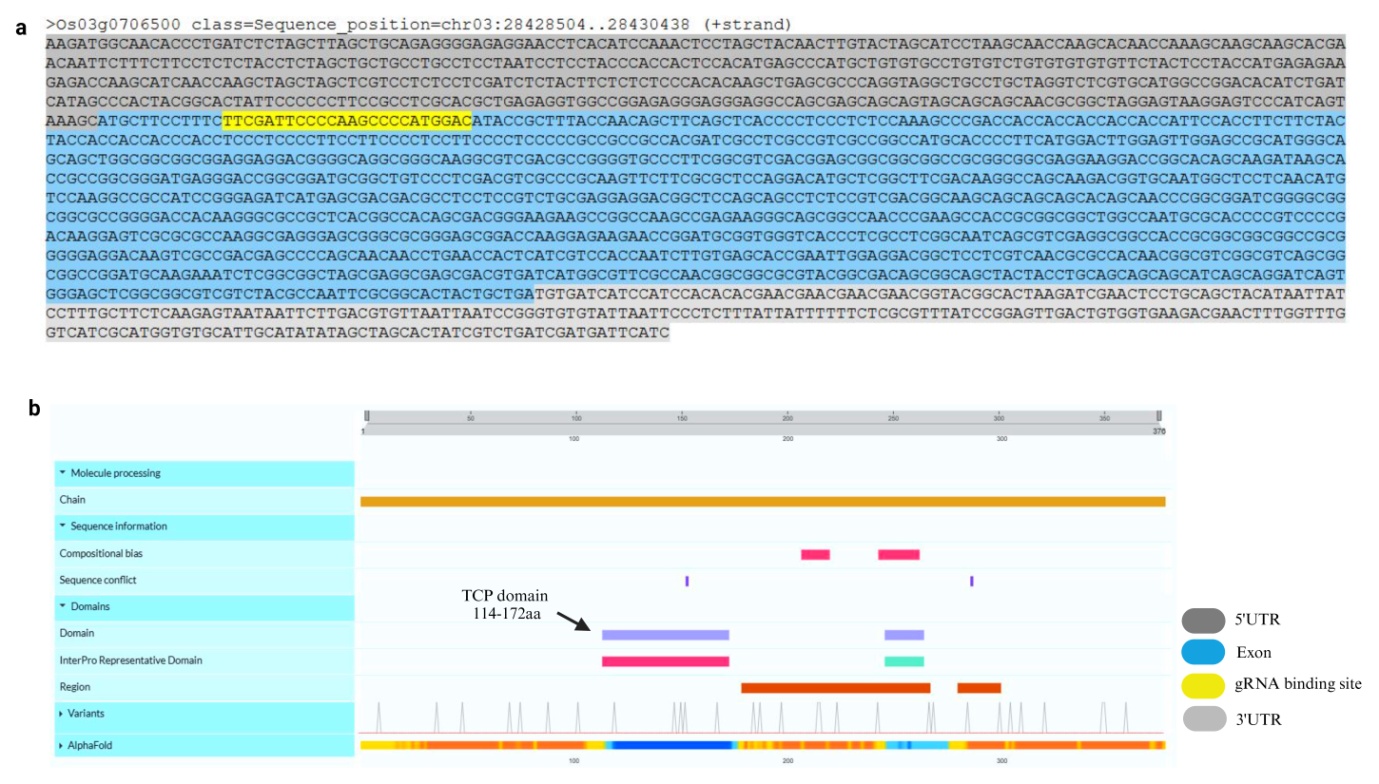
**

**Supplementary Fig. 1(c).** *OsTB1* (*TEOSINTE BRANCHED 1*), (a) gene sequence retrieved from the RAP-DB portal (<https://rapdb.dna.affrc.go.jp/>), (b) protein domain identified from the UniProt blast server (<https://www.uniprot.org/uniprotkb>).

**
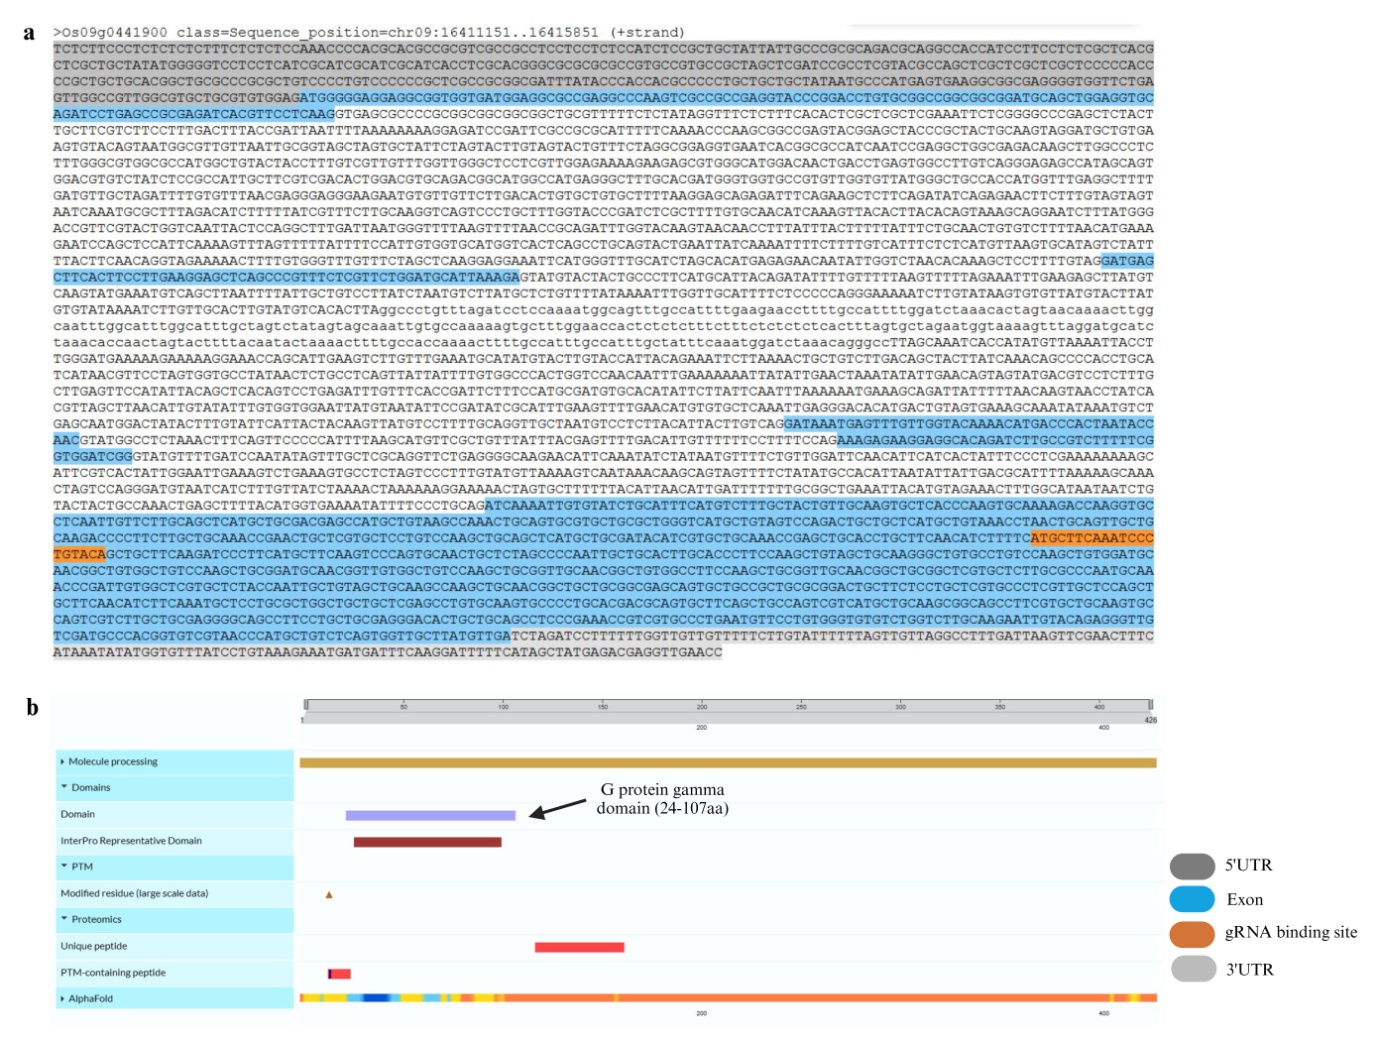
**

**Supplementary Fig. 1(d)**. *OsDEP1* (*DENSE AND ERECT PANICLE 1*), (a) gene sequence retrieved from the RAP-DB portal (<https://rapdb.dna.affrc.go.jp/>), (b) protein domain identified from the UniProt blast server (https://www.uniprot.org/uniprotkb)

**
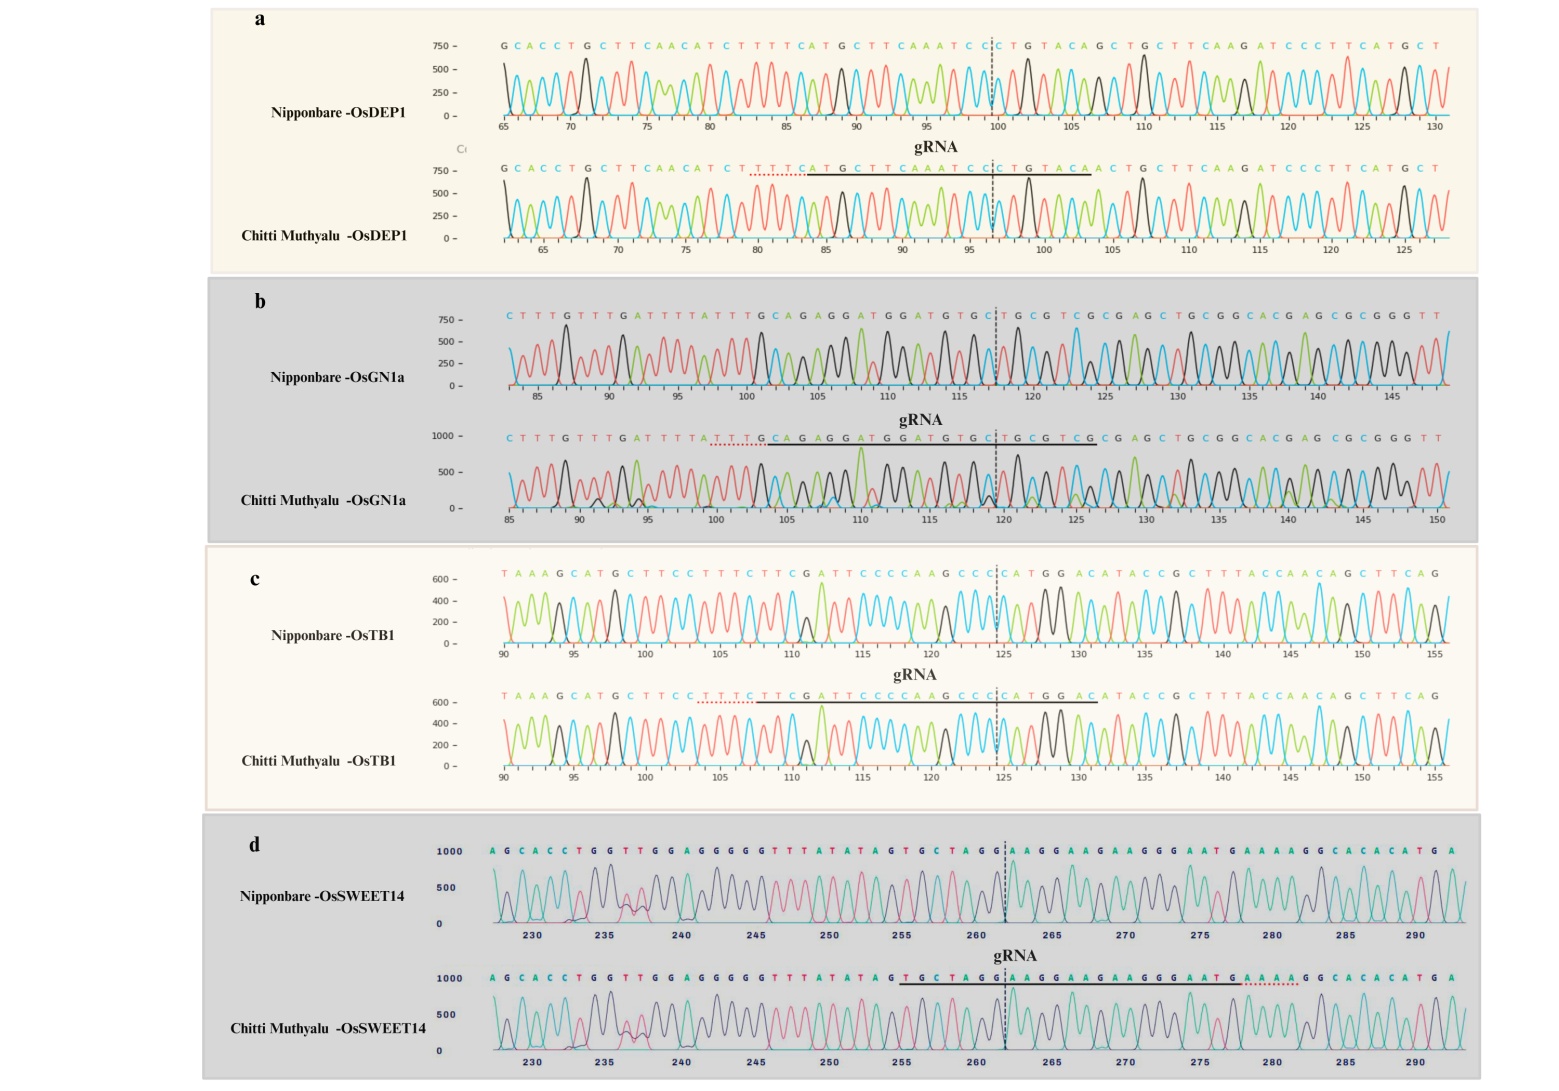
**

**Supplementary Fig. 2**.Sequence alignment of the target genes *OsDEP1*, *OsCKX2 (Gn1a),* *OsTB1 and OsSWEET14* and guide RNAs.The dotted line next to the gRNA represents the PAM sequence.


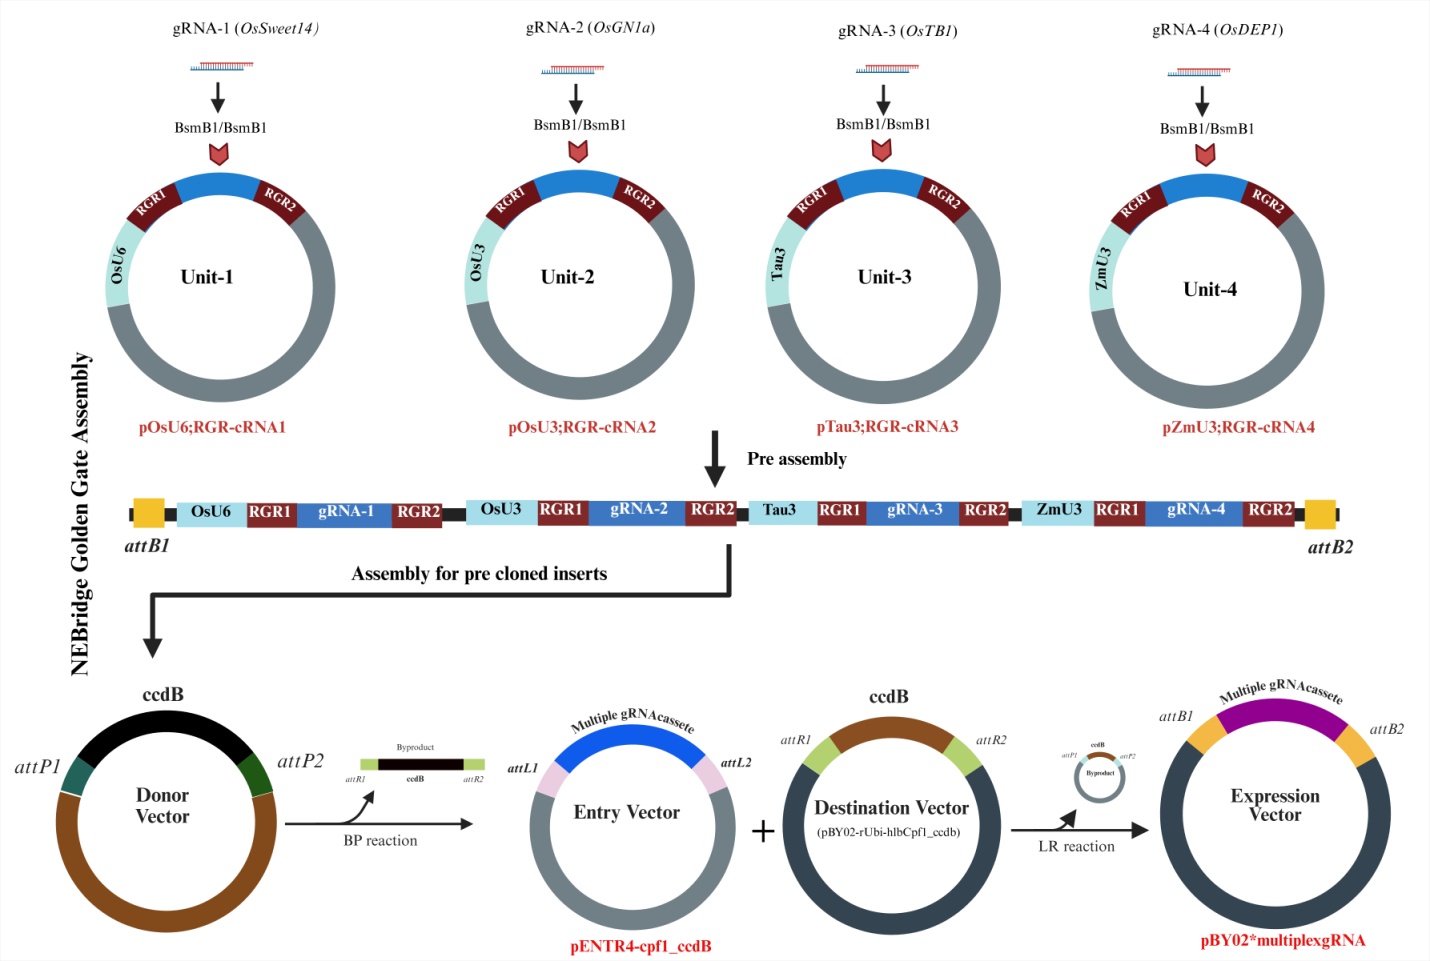


**Supplementary Fig. 3.** Schematic flow of the multiplex genome editing construct preparation.

**
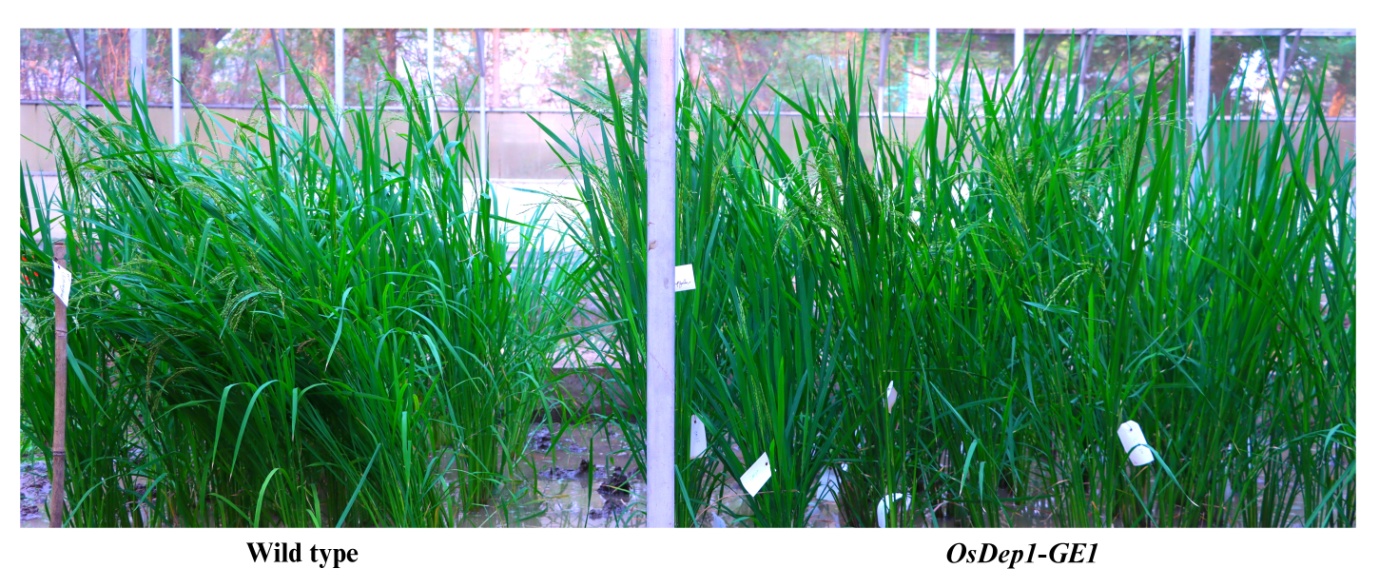
**

**Supplementary Fig. 4.** The *OsDEP1* gene edited plants and wild type Chittimuthyalu growing at T1 generation in a Biosafety screenhouse.

**Table S1.** Sequences of gRNAs used in this study

| **Target genes** | **gRNA sequences** |
| --- | --- |
| ***OsGn1a*** | CAGAGGATGGATGTGCTGCGTCG |
| ***OsDEP1*** | ATGCTTCAAATCCCTGTACA |
| ***OsTB1*** | TTCGATTCCCCAAGCCCCATGGAC |
| ***OsSWEET14*** | CATTCCCTTCTTCCTTCCTAGCA |

**Table S2:** List of primers used in this study

| **Sl #** | **Primers** | **Sequence** |
| --- | --- | --- |
| 1 | U6PR3 | TTGTACAAGAAAGCTGGGTCTAGA |
| 2 | U6PF1b | CGTTGAGGGGAGACAGGTTTAG |
| 3 | CPF1 F | CAAGGAGACAAACAGGGACGAG |
| 4 | CPF1 R | CAGCCAGGCAGGGATGTAAAAG |
| 5 | HYG F | CTGCATCATCGAAATTGCCGT |
| 6 | HYG R | CGAAAAGTTCGACAGCGTCT |
| 7 | 35S P F | GGTCGTCCTCTCCAAATGAAATG |
| 8 | 35S P R | CACGACACTCTCGTCTACTCCA |
| 9 | SEQ F | GGCCCGTGTCTCAAAATCTC |
| 10 | SEQ R | GCGGTGCTACAGAGTTCTTG |
| 11 | OsUbi F | TCCTAACGGCGAACCAACAAA |
| 12 | OsUbi R1 | GGACGCGAGAGGATTCGATT |
| 13 | M13 F | GTAAAACGACGGCCAGT |
| 14 | M13 R | CAGGAAACAGCTATGAC |
| 15 | OSCKX2 F (gRNA) | AGATCAGAGGATGGATGTGCTGCGTCG |
| 16 | OSCKX2 R (gRNA) | GCCTCGACGCAGCACATCCATCCTCTG |
| 17 | DEP1 F (gRNA) | AGATATGCTTCAAATCCCTGTACA |
| 18 | DEP1 R (gRNA) | GCCTTGTACAGGGATTTGAAGCAT |
| 19 | TB1 F (gRNA) | AGAT TTCGATTCCCCAAGCCCCATGGAC |
| 20 | TB1 R (gRNA) | GCCT GTCCATGGGGCTTGGGGAATCGAA |
| 21 | SWEET 14 F (gRNA) | AGATCATTCCCTTCTTCCTTCCTAGCA |
| 22 | SWEET 14 R (gRNA) | GCCTTGCTAGGAAGGAAGAAGGGAATG |
| 23 | SEQ F1 | CGTTGAGGGGAGACAGGTTT |
| 24 | SEQ R1 | GAGATTTTGAGACACGGGCC |
| 25 | Seq F2 | TGATGTCTCTCAGATGGGCC |
| 26 | Seq R2 | AAGGACTCGTAATTGCTGGC |
| 27 | Xa13 F | TGGCGTACACCACCAAAAGTGG |
| 28 | Xa13 R | AAACCCACTTTTGGTGGTGTA |
| 29 | DEP1 Set2 seq F | CTCATGCTGCGATACATCGTG |
| 30 | DEP1 Set2 seq R | CTACAGCTTGGAAGGGTGCAA |
| 31 | DEP seq F | AGTTTGCTCGCAGGTTCTGA |
| 32 | DEP seq R | GCCACAATCGGGTTTGCATT |
| 33 | TB1 SET1 seq F | CACTACGGCACTATTCCCCC |
| 34 | TB1 SET1 seq R | CGGCGGTGCTTATCTTGCTG |
| 35 | TB1 SET2 seq F | GCTCGTCCTCTCCTCGATCT |
| 36 | TB1 SET2 seq R | TCGCTCATGATCTCCCGGAT |
| 37 | OSCKX2 E3 seq F | CTCACTTTATCCTTGCATGAC |
| 38 | OSCKX2 E3 seq R | TGAGGGGTCGTCATTTTG |
| 39 | SWEET 14 SEQ F | TCCTTTGCGGCTCATCAGTT |
| 40 | SWEET 14 SEQ R | CTGAAGAGACATGCCAGCCA |
| 41 | TGW3 qrt F | CTACGATCCGTGGCCGAAAT |
| 42 | TGW3 qrt R | CAGTTCCGACCACATGCTCA |
| 43 | DEP 1 QRT F | CTTGCCGTCTTTTTCGGTGG |
| 44 | DEP 1 QRT R | GGCACCTTGGTCTTTTGCAC |
| 45 | GS3 QRT F | ATGCTGCAGAGAGGTTGACG |
| 46 | GS3 QRT R | CTTGCTCTGCACAAACAGCG |
| 47 | GW5QRT F | GGCGTTCAACTTCAAGACGG |
| 48 | GW5QRT R | ACCACCTCCTCTGCAAGAAC |
| 49 | DREB1C qrt F | TGATGCAGTACCAGGACGAC |
| 50 | DREB1C qrt R | GGCTGGTCGAAGTCCATGTT |
| 51 | TGW6 qrt F | ATGAGCTTCCCTTTGGTCCG |
| 52 | TGW6 qrt R | TCTCCATCACTTCGGTTGGC |
